# Supplementary material for: Genomic analyses of Northern snakehead (Channa argus) populations in North America
Source: PubMed Central journal article supplement (PMC5889702; doi:10.7717/peerj.4581), 2018-04-04

**Value of BIC  
versus number of clusters**

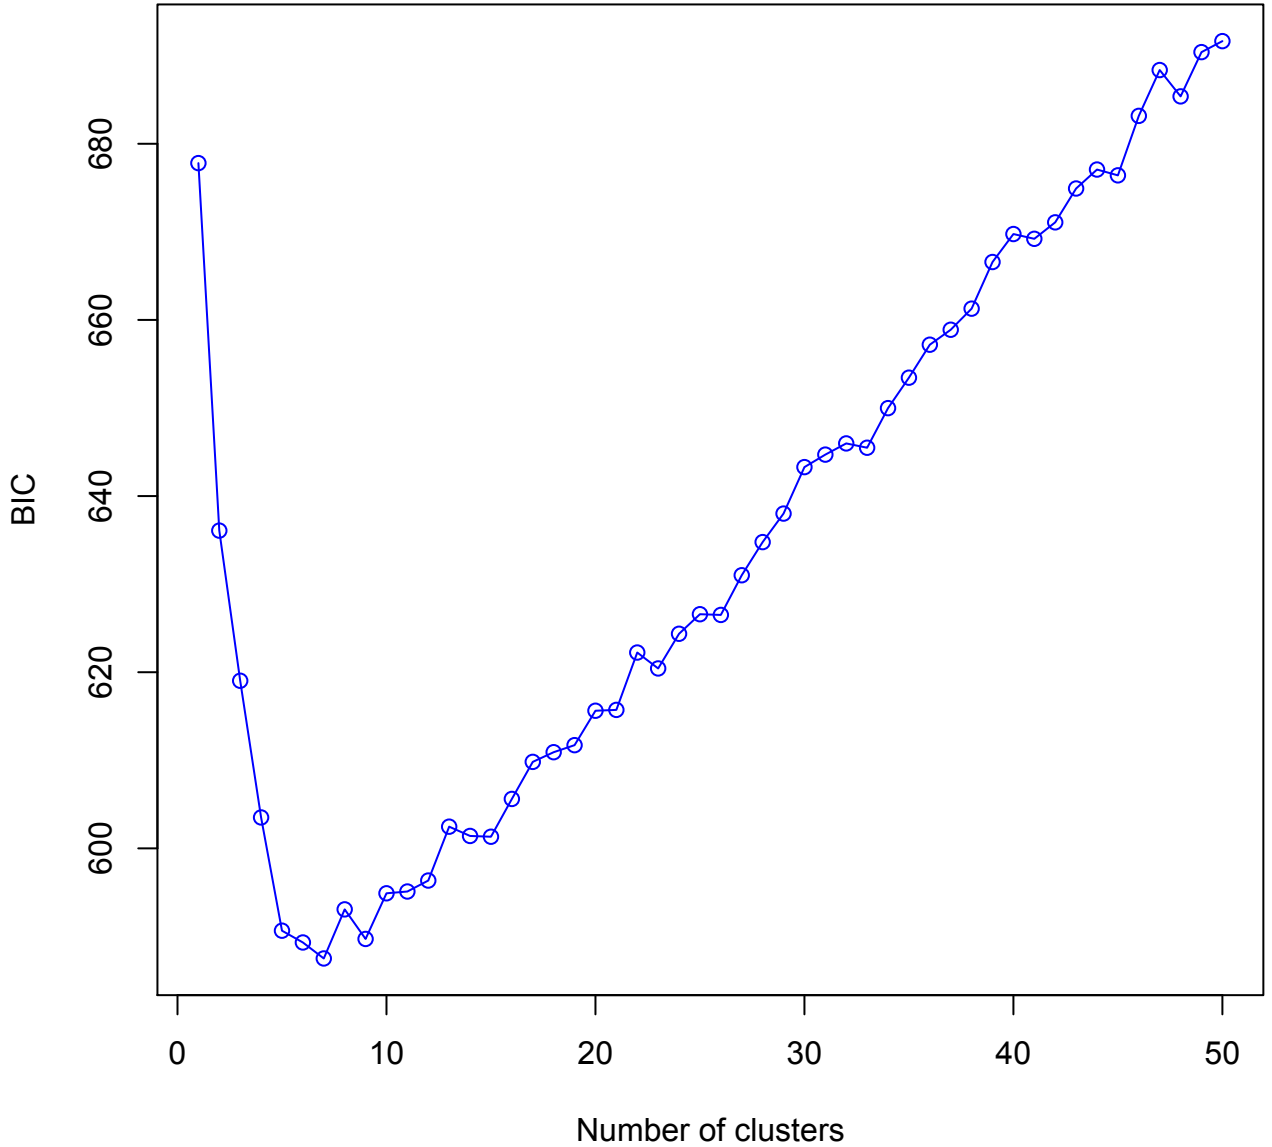

Supplement: peerj-06-4581-s001.pdf [file peerj-06-4581-s001.pdf]
