# Supplementary material for: Genomic analyses of Northern snakehead (Channa argus) populations in North America
Source: PubMed Central journal article supplement (PMC5889702; doi:10.7717/peerj.4581), 2018-04-04

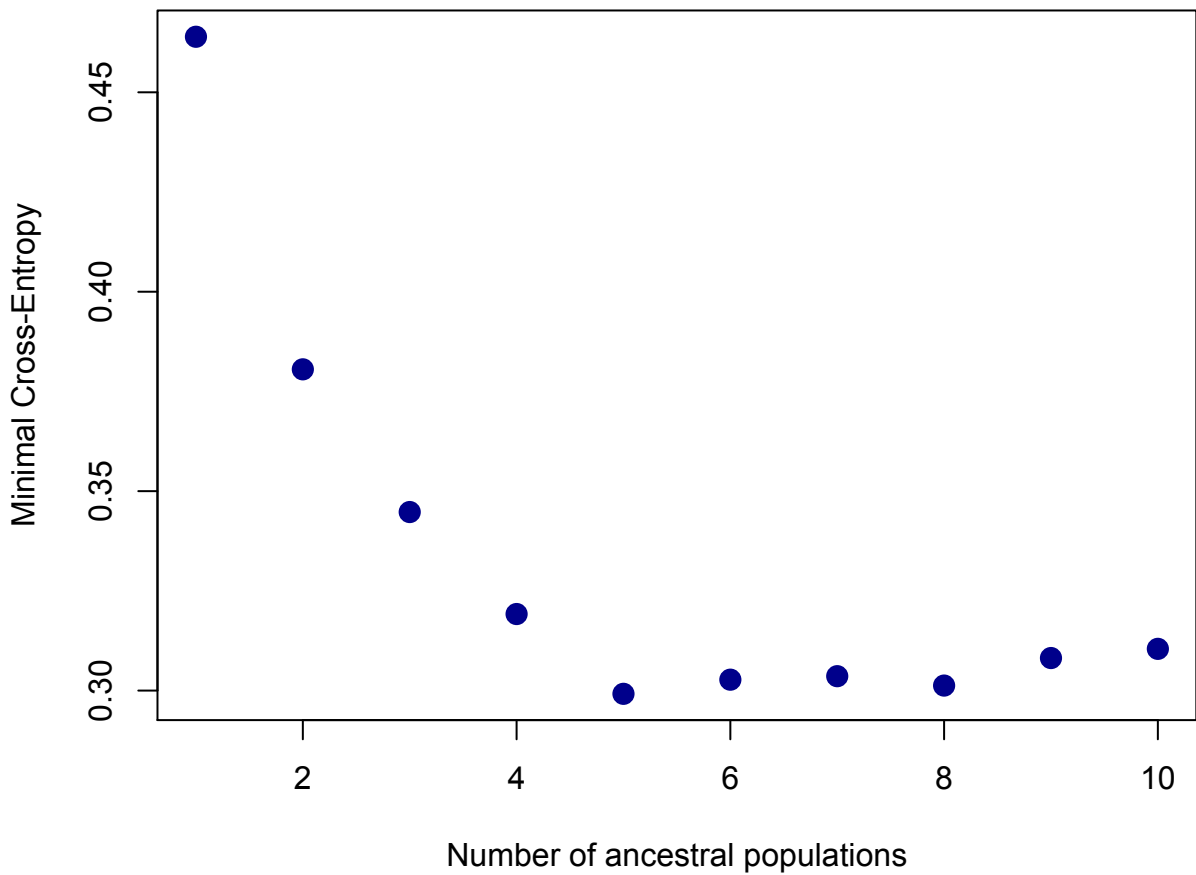

Supplement: peerj-06-4581-s002.pdf [file peerj-06-4581-s002.pdf]
