# Supplementary material for: Genomic analyses of Northern snakehead (Channa argus) populations in North America
Source: PeerJ. 2018 Apr 4;6:e4581. doi: 10.7717/peerj.4581 (PMC5889702; doi:10.7717/peerj.4581)
Supplement: Table S3 [file peerj-06-4581-s003.xlsx]

## Sheet: Sheet1
Supplementary Table 1. Detailed collection information
Collection ID	Tissue Sample #	Locality	Watershed	Latitude (approx.)	Longitude (approx.)	Date Collected
1282	SH1	Potomac River basin	Chopawamsic Creek	38.5071	-77.3196	2013-03-28
1283	SH2	Potomac River basin	Chopawamsic Creek	38.5071	-77.3196	2013-04-22
1284	SH3	Potomac River basin	Chopawamsic Creek	38.5071	-77.3196	2013-04-22
1287	SH6	Potomac River basin	Chopawamsic Creek	38.5071	-77.3196	2013-04-22
1288	SH7	Potomac River basin	Chopawamsic Creek	38.5071	-77.3196	2013-04-22
1290	SH9	Potomac River basin	Chopawamsic Creek	38.5071	-77.3196	2013-04-22
1291	10	Potomac River basin	Mattawoman Creek (MD)	38.5651	-77.2161	2013-06-03
1292	11	Potomac River basin	Pomonkey Creek (MD)	38.6326	-77.108	2013-06-03
1294	13	Potomac River basin	Pomonkey Creek (MD)	38.6326	-77.108	2013-06-03
1295	14	Potomac River basin	Pomonkey Creek (MD)	38.6326	-77.108	2013-06-03
1296	15	Potomac River basin	Pomonkey Creek (MD)	38.6326	-77.108	2013-06-03
1297	16	Potomac River basin	Pomonkey Creek (MD)	38.6326	-77.108	2013-06-03
1298	17	Potomac River basin	Pomonkey Creek (MD)	38.6326	-77.108	2013-06-03
1299	18	Potomac River basin	Pomonkey Creek (MD)	38.6326	-77.108	2013-06-03
1300	19	Potomac River basin	Pomonkey Creek (MD)	38.6326	-77.108	2013-06-03
1301	20	Potomac River basin	Pomonkey Creek (MD)	38.6326	-77.108	2013-06-03
1302	21	Potomac River basin	Pomonkey Creek (MD)	38.6326	-77.108	2013-06-03
1303	22	Potomac River basin	Pomonkey Creek (MD)	38.6326	-77.108	2013-06-03
1306	25	Potomac River basin	Pomonkey Creek (MD)	38.6326	-77.108	2013-06-03
1307	26	Potomac River basin	Pomonkey Creek (MD)	38.6326	-77.108	2013-06-03
1308	27	Potomac River basin	Pomonkey Creek (MD)	38.6326	-77.108	2013-06-03
1311	30	Potomac River basin	Pomonkey Creek (MD)	38.6326	-77.108	2013-06-03
1312	31	Potomac River basin	Pomonkey Creek (MD)	38.6326	-77.108	2013-06-03
1313	32	Potomac River basin	Pomonkey Creek (MD)	38.6326	-77.108	2013-06-03
1428	1	Potomac River basin	Potomac Creek	38.3468	-77.315	2013-09-03
1429	2	Potomac River basin	Potomac Creek	38.3468	-77.315	2013-09-03
1430	3	Potomac River basin	Accokeek Creek	38.3631	-77.3076	2013-09-03
1431	4	Potomac River basin	Powells Creek	38.589	-77.2806	2013-09-04
1432	5	Potomac River basin	Little Hunting Creek	38.7238	-77.0805	2013-09-12
1433	6	Potomac River basin	Little Hunting Creek	38.7238	-77.0805	2013-09-12
1435	8	Potomac River basin	Little Hunting Creek	38.7238	-77.0805	2013-09-12
1436	9	Potomac River basin	Little Hunting Creek	38.7238	-77.0805	2013-09-12
1437	10	Potomac River basin	Little Hunting Creek	38.7238	-77.0805	2013-09-12
1438	11	Potomac River basin	Little Hunting Creek	38.7238	-77.0805	2013-09-12
1439	12	Potomac River basin	Little Hunting Creek	38.7238	-77.0805	2013-09-12
1440	13	Potomac River basin	Little Hunting Creek	38.7238	-77.0805	2013-09-12
1441	14	Potomac River basin	Little Hunting Creek	38.7238	-77.0805	2013-09-12
1442	15	Potomac River basin	Little Hunting Creek	38.7238	-77.0805	2013-09-12
1443	16	Potomac River basin	Little Hunting Creek	38.7238	-77.0805	2013-09-12
1444	17	Potomac River basin	Little Hunting Creek	38.7238	-77.0805	2013-09-12
1445	18	Potomac River basin	Little Hunting Creek	38.7238	-77.0805	2013-09-12
1448	21	Potomac River basin	Little Hunting Creek	38.7238	-77.0805	2013-09-12
1449	22	Potomac River basin	Pohick Creek	38.6843	-77.1866	2013-09-12
1450	23	Chesapeake Bay (MD)	Rappahannock River	37.7989	-76.6759	2013-09-17
1466	NSH 11	Chesapeake Bay DE	Delaware River, DE	38.6224	-75.7062	2013-10-09
1469	-	Chesapeake Bay (MD)	Blackwater River, MD	38.3601	-76.0074	2013-10-20
1470	-	Chesapeake Bay (MD)	Wicomico River, MD	38.2168	-75.8924	2013-10-20
1474	NCSM 67263-1	Potomac River basin	Mattawoman Creek (MD)	38.5651	-77.1935	2011-10-20
1475	NCSM 67263-2	Potomac River basin	Mattawoman Creek (MD)	38.5651	-77.1935	2011-10-20
1476	NCSM 67263-3	Potomac River basin	Mattawoman Creek (MD)	38.5651	-77.1935	2011-10-20
1477	NCSM 67263-4	Potomac River basin	Mattawoman Creek (MD)	38.5651	-77.1935	2011-10-20
1478	NCSM 67263-5	Potomac River basin	Mattawoman Creek (MD)	38.5651	-77.1935	2011-10-20
1479	NCSM 74700-1	Potomac River basin	Potomac Creek	38.3473	-77.3587	2013-09-03
1480	NCSM 74700-2	Potomac River basin	Potomac Creek	38.3473	-77.3587	2013-09-03
1317	SH2	Upper Hudson River basin	Catlin Creek	41.3631	-74.4935	2009-10-07
1318	SH3	Upper Hudson River basin	Catlin Creek	41.3631	-74.4935	2009-10-06
1319	SH4	Upper Hudson River basin	Catlin Creek	41.3631	-74.4935	2009-10-06
1320	SH5	Upper Hudson River basin	Catlin Creek	41.3631	-74.4935	2009-10-06
1322	SH7	Upper Hudson River basin	Catlin Creek	41.3631	-74.4935	2009-10-06
1323	SH8	Upper Hudson River basin	Catlin Creek	41.3631	-74.4935	2009-10-06
1324	SH9	Upper Hudson River basin	Catlin Creek	41.3631	-74.4935	2008-08-05
1325	SH10	Upper Hudson River basin	Catlin Creek	41.3631	-74.4935	2008-08-05
1326	SH11	Upper Hudson River basin	Catlin Creek	41.3631	-74.4935	2008-08-05
1327	SH12	Upper Hudson River basin	Catlin Creek	41.3631	-74.4935	2008-08-05
1328	SH13	Upper Hudson River basin	Catlin Creek	41.3631	-74.4935	2008-08-05
1331	SH16	Upper Hudson River basin	Catlin Creek	41.3631	-74.4935	2008-08-05
1334	SH19	Upper Hudson River basin	Catlin Creek	41.3631	-74.4935	2008-08-05
1335	SH20	Upper Hudson River basin	Catlin Creek	41.3631	-74.4935	2008-08-05
1336	SH21	Upper Hudson River basin	Catlin Creek	41.3631	-74.4935	2008-08-05
1337	SH22	Upper Hudson River basin	Catlin Creek	41.3631	-74.4935	2008-08-05
1338	SH23	Upper Hudson River basin	Catlin Creek	41.3631	-74.4935	no date
1339	SH24	Upper Hudson River basin	Catlin Creek	41.3631	-74.4935	no date
1349	SH34	Upper Hudson River basin	Catlin Creek	41.3631	-74.4935	no date
1355	SH40	Upper Hudson River basin	Catlin Creek	41.3631	-74.4935	2008-08-05
1356	SH41	Upper Hudson River basin	Catlin Creek	41.3631	-74.4935	2008-08-05
1360	SH45	Upper Hudson River basin	Catlin Creek	41.3631	-74.4935	2008-08-05
1362	SH47	Upper Hudson River basin	Catlin Creek	41.3631	-74.4935	2009-10-08
1363	SH48	Upper Hudson River basin	Catlin Creek	41.3631	-74.4935	2008-08-05
1364	SH49	Upper Hudson River basin	Catlin Creek	41.3631	-74.4935	2008-08-05
1365	SH50	Upper Hudson River basin	Catlin Creek	41.3631	-74.4935	2008-08-05
1366	SH51	Upper Hudson River basin	Catlin Creek	41.3631	-74.4935	2008-08-05
1367	SH52	Upper Hudson River basin	Catlin Creek	41.3631	-74.4935	2008-08-05
1368	SH53	Upper Hudson River basin	Catlin Creek	41.3631	-74.4935	2008-08-05
1369	SH54	Upper Hudson River basin	Catlin Creek	41.3631	-74.4935	2008-08-05
1370	SH55	Upper Hudson River basin	Catlin Creek	41.3631	-74.4935	2008-08-05
1371	SH56	Upper Hudson River basin	Catlin Creek	41.3631	-74.4935	2008-08-05
1375	SH60	Upper Hudson River basin	Catlin Creek	41.3631	-74.4935	2008-08-05
1376	SH61	Upper Hudson River basin	Catlin Creek	41.3631	-74.4935	2008-08-05
1379	SH64	Upper Hudson River basin	Catlin Creek	41.3631	-74.4935	2008-08-05
1380	SH65	Upper Hudson River basin	Catlin Creek	41.3631	-74.4935	2008-08-05
1381	SH66	Upper Hudson River basin	Catlin Creek	41.3631	-74.4935	2008-08-05
1382	SH67	Upper Hudson River basin	Catlin Creek	41.3631	-74.4935	2008-08-05
1383	SH68	Upper Hudson River basin	Catlin Creek	41.3631	-74.4935	2008-08-05
1384	SH69	Upper Hudson River basin	Catlin Creek	41.3631	-74.4935	2008-08-05
1385	SH70	Upper Hudson River basin	Catlin Creek	41.3631	-74.4935	2008-08-05
1386	SH71	Upper Hudson River basin	Catlin Creek	41.3631	-74.4935	2008-08-05
1395	SH80	Upper Hudson River basin	Catlin Creek	41.3631	-74.4935	no date
1398	SH83	Upper Hudson River basin	Catlin Creek	41.3631	-74.4935	no date
1400	SH85	Upper Hudson River basin	Catlin Creek	41.3631	-74.4935	no date
1401	SH86	Upper Hudson River basin	Catlin Creek	41.3631	-74.4935	no date
1402	SH87	Upper Hudson River basin	Catlin Creek	41.3631	-74.4935	no date
1403	SH88	Upper Hudson River basin	Catlin Creek	41.3631	-74.4935	no date
1404	SH89	Upper Hudson River basin	Catlin Creek	41.3631	-74.4935	no date
1405	SH90	Upper Hudson River basin	Catlin Creek	41.3631	-74.4935	no date
1406	SH91	Upper Hudson River basin	Catlin Creek	41.3631	-74.4935	no date
1408	SH93	Upper Hudson River basin	Catlin Creek	41.3631	-74.4935	no date
1409	SH94	Upper Hudson River basin	Catlin Creek	41.3631	-74.4935	no date
1414	SH99	Upper Hudson River basin	Catlin Creek	41.3631	-74.4935	no date
1420	SH105	Upper Hudson River basin	Catlin Creek	41.3631	-74.4935	Spring 2009
1423	SH108	Upper Hudson River basin	Catlin Creek	41.3631	-74.4935	2008-08-07
1424	SH109	Upper Hudson River basin	Catlin Creek	41.3631	-74.4935	2009-04-06
1426	SH111	Upper Hudson River basin	Catlin Creek	41.3631	-74.4935	No Date
1427	SH112	Upper Hudson River basin	Catlin Creek	41.3631	-74.4935	2008-08-06
1451	NSH 1	Lower Hudson River basin	Meadow Lake	40.7343	-73.8407	2013-10-28
1452	NSH 2	Lower Hudson River basin	Meadow Lake	40.7343	-73.8407	2013-10-28
1453	NSH 3	Lower Hudson River basin	Meadow Lake	40.7343	-73.8407	2013-10-28
1454	NSH 4	Lower Hudson River basin	Meadow Lake	40.7343	-73.8407	2013-10-28
1455	NSH 5	Lower Hudson River basin	Meadow Lake	40.7343	-73.8407	2013-10-28
1456	NSH 1	Lower Hudson River basin	Willow Lake	40.7237	-73.8329	2013-10-29
1457	NSH 2	Lower Hudson River basin	Willow Lake	40.7237	-73.8329	2013-10-29
1459	NSH 4	Lower Hudson River basin	Willow Lake	40.7237	-73.8329	2013-10-29
1460	NSH 5	Lower Hudson River basin	Willow Lake	40.7237	-73.8329	2013-10-29
1461	NSH 6	Lower Hudson River basin	Willow Lake	40.7237	-73.8329	2013-10-29
1471	NCSM 30519-1	Chinatown, Manhattan	Unknown	Unknown	Unknown	2001-11-08
1472	NCSM 30519-2	Chinatown, Manhattan	Unknown	Unknown	Unknown	2001-11-08
1473	NCSM 30519-3	Chinatown, Manhattan	Unknown	Unknown	Unknown	2001-11-08
1513	F-5449	Philadelphia	Edgewood Lake	39.9025	-75.1803	2013-04-10
1538	F-7021	Philadelphia	Edgewood Lake	39.9025	-75.1803	2009-03-25
1541	F-7024	Philadelphia	Edgewood Lake	39.9025	-75.1803	2010-04-07
1543	F-7026	Philadelphia	Edgewood Lake	39.9025	-75.1803	2010-04-07
1544	F-7027	Philadelphia	Edgewood Lake	39.9025	-75.1803	2010-04-07
1545	F-7028	Philadelphia	Edgewood Lake	39.9025	-75.1803	2010-04-07
1546	F-7029	Philadelphia	Edgewood Lake	39.9025	-75.1803	2010-04-07
1547	F-7030	Philadelphia	Edgewood Lake	39.9025	-75.1803	2009-03-25
1549	F-7032	Philadelphia	Edgewood Lake	39.9025	-75.1803	2009-03-25
1550	F-7033	Philadelphia	Edgewood Lake	39.9025	-75.1803	2009-03-25
1551	F-7034	Philadelphia	Edgewood Lake	39.9025	-75.1803	2009-10-22
1554	F-7037	Philadelphia	Edgewood Lake	39.9025	-75.1803	2009-10-22
1555	F-7038	Philadelphia	Edgewood Lake	39.9025	-75.1803	2009-10-22
1556	F-7039	Philadelphia	Edgewood Lake	39.9025	-75.1803	2009-10-22
1557	F-7040	Philadelphia	Edgewood Lake	39.9025	-75.1803	2011-04-13
1558	F-7041	Philadelphia	Edgewood Lake	39.9025	-75.1803	2011-04-13
1561	F-7044	Philadelphia	Edgewood Lake	39.9025	-75.1803	2011-04-13
1562	F-7045	Philadelphia	Edgewood Lake	39.9025	-75.1803	2011-04-13
1563	F-7149	Philadelphia	Edgewood Lake	39.9025	-75.1803	2012-11-16
1564	F-7150	Philadelphia	Edgewood Lake	39.9025	-75.1803	2012-04-26
1565	F-7151	Philadelphia	Darby Creek	39.8725	-75.3058	2012-04-26
AR1	NSH	Arkansas	Lee Creek	35.4864	-94.3966	2016-10-06
AR3	NSH	Arkansas	Piney Creek	34.8609	-91.1611	2016-10-13
AR5	NSH	Arkansas	Bonner Farm	34.8644	-91.1834	10/8/2016
AR6	NSH-7	Arkansas	Bonner Farm	34.8644	-91.1834	2016-10-12
AR7	NSH-16	Arkansas	Bonner Farm	34.8644	-91.1834	2016-10-12
AR8	NSH-10	Arkansas	Bonner Farm	34.8644	-91.1834	2016-10-12
AR10	NSH-27	Arkansas	Piney Creek	34.8609	-91.1611	2016-10-21
AR11	NSH-21	Arkansas	Delta Ducks LLC	34.7907	-91.1121	2016-10-13
AR12	NSH-3	Arkansas	Bonner Farm	34.8644	-91.1834	2016-10-12
AR13	NSH-17	Arkansas	Bonner Farm	34.8644	-91.1834	2016-10-12
AR15	NSH-26	Arkansas	Piney Creek	34.8609	-91.1611	2016-10-21
AR16	NSH-4	Arkansas	Bonner Farm	34.8644	-91.1834	2016-10-12
AR17	NSH-14	Arkansas	Bonner Farm	34.8644	-91.1834	2016-10-12
AR18	NSH-6	Arkansas	Bonner Farm	34.8644	-91.1834	2016-10-12
AR19	NSH-11	Arkansas	Bonner Farm	34.8644	-91.1834	2016-10-12
AR21	NSH-5	Arkansas	Bonner Farm	34.8644	-91.1834	2016-10-12
AR23	NSH-8	Arkansas	Bonner Farm	34.8644	-91.1834	2016-10-12
AR27	NSH-20	Arkansas	Bayou De View	34.7918	-91.2976	2016-09-27
